# Supplementary material for: RecA and Specialized Error-Prone DNA Polymerases Are Not Required for Mutagenesis and Antibiotic Resistance Induced by Fluoroquinolones in Pseudomonas aeruginosa
Source: MDPI journal article supplement (doi:10.3390/antibiotics11030325), 2022-02-28
Supplement: s1 [file s1]

# RecA and specialized error-prone DNA polymerases are not required for mutagenesis and antibiotic resistance induced by fluoroquinolones in *Pseudomonas aeruginosa*

Jessica Mercolino, Alessandra Lo Sciuto, Maria Concetta Spinnato, Giordano Rampioni, and Francesco Imperi

## SUPPLEMENTARY MATERIAL

**Table S1.** Bacterial strains and plasmids used in this study.

| Strain or plasmid                      | Genotype and/or relevant characteristics                                                                                    | Reference or source              |
|----------------------------------------|-----------------------------------------------------------------------------------------------------------------------------|----------------------------------|
| <b><i>P. aeruginosa</i></b>            |                                                                                                                             |                                  |
| PAO1 (ATCC15692)                       | Prototroph                                                                                                                  | American type culture collection |
| $\Delta recA$                          | PAO1 with an in-frame deletion of <i>recA</i> (PA3617)                                                                      | [65]                             |
| $\Delta recA recA^+$                   | $\Delta recA$ with a copy of <i>recA</i> , including its own promoter, inserted into the <i>attB</i> site of the chromosome | This work                        |
| $\Delta polB$                          | PAO1 with an in-frame deletion of <i>polB</i> (PA1886)                                                                      | [66]                             |
| $\Delta dinB$                          | PAO1 with an in-frame deletion of <i>dinB</i> (PA0923)                                                                      | [66]                             |
| $\Delta imuC$                          | PAO1 with an in-frame deletion of <i>imuC</i> (PA0669)                                                                      | [66]                             |
| $\Delta polB \Delta recA$              | $\Delta polB$ deleted of <i>recA</i>                                                                                        | [66]                             |
| $\Delta dinB \Delta recA$              | $\Delta dinB$ deleted of <i>recA</i>                                                                                        | [66]                             |
| $\Delta imuC \Delta recA$              | $\Delta imuC$ deleted of <i>recA</i>                                                                                        | [66]                             |
| PAO1 CIP <sup>R</sup> -1               | Ciprofloxacin resistant spontaneous mutant of PAO1, selected on agar plate supplemented with 1 µg/mL ciprofloxacin (8×MIC)  | This work                        |
| PAO1 CIP <sup>R</sup> -1 $\Delta recA$ | PAO1 CIP <sup>R</sup> -1 deleted of <i>recA</i>                                                                             | This work                        |
| PAO1 CIP <sup>R</sup> -2               | Ciprofloxacin resistant spontaneous mutant of PAO1, selected on agar plate supplemented with 1 µg/mL ciprofloxacin (8×MIC)  | This work                        |
| PAO1 CIP <sup>R</sup> -2 $\Delta recA$ | PAO1 CIP <sup>R</sup> -2 deleted of <i>recA</i>                                                                             | This work                        |
| <b><i>E. coli</i></b>                  |                                                                                                                             |                                  |
| S17.1 $\lambda$ pir                    | <i>thi pro hsdRhsdM<sup>+</sup> recA RP4-2-Tc::Mu-Km::Tn7 <math>\lambda</math>pir</i> , Sm <sup>R</sup>                     | [67]                             |
| <b>Plasmid</b>                         |                                                                                                                             |                                  |
| pBluescript II KS+                     | Cloning vector; ColE1 replicon; Ap <sup>R</sup>                                                                             | Stratagene                       |
| pDM4 $\Delta recA$                     | <i>sacB</i> -based suicide construct for the in-frame deletion of <i>recA</i> by homologous recombination                   | [65]                             |
| pDM4 $\Delta polA$                     | <i>sacB</i> -based suicide construct for the in-frame deletion of <i>polA</i> (PA5493) by homologous recombination          | [66]                             |
| pDM4 $\Delta polB$                     | <i>sacB</i> -based suicide construct for the in-frame deletion of <i>polB</i> by homologous recombination                   | [66]                             |
| pDM4 $\Delta dinB$                     | <i>sacB</i> -based suicide construct for the in-frame deletion of <i>dinB</i> by homologous recombination                   | [66]                             |
| pDM4 $\Delta imuC$                     | <i>sacB</i> -based suicide construct for the in-frame deletion of <i>imuC</i> by homologous recombination                   | [66]                             |
| pDM4 $\Delta rmsA$                     | <i>sacB</i> -based suicide construct for the in-frame deletion of <i>rsmA</i> by homologous recombination                   | [38]                             |

|                       |                                                                                                                        |            |
|-----------------------|------------------------------------------------------------------------------------------------------------------------|------------|
| mini-CTX1             | Self-proficient integration vector, $\Omega$ -FRT-attP-MCS, <i>ori</i> ,<br><i>int</i> , <i>oriT</i> ; Tc <sup>R</sup> | [37]       |
| mini-CTX1 <i>recA</i> | mini-CTX1 derivative carrying the <i>P. aeruginosa recA</i><br>gene with its own promoter                              | This study |
| pFLP2                 | Broad-host-range plasmid expressing the Flp recombinase,<br><i>sacB</i> ; Ap <sup>R</sup> /Cb <sup>R</sup>             | [36]       |

---

**Table S2.** Primers used in this study.

| Primer name               | Sequence (5'→3') <sup>a</sup>        | Restriction site | Application                         |
|---------------------------|--------------------------------------|------------------|-------------------------------------|
| <i>recA</i> _mini-CTX1_FW | cgcaagc <u>TT</u> CGGAACATTCTTCCCGTC | HindIII          | Generation of mini-CTX1 <i>recA</i> |
| <i>recA</i> _mini-CTX1_RV | ccggatCCTCAATCGGCTTCGGCG             | BamHI            |                                     |
| <i>recN</i> _RT_FW        | AGGAGCAGAAGACCCTGAGC                 |                  | qRT-PCR                             |
| <i>recN</i> _RT_RV        | GACAACAGGTTGACCGCTTC                 |                  |                                     |
| <i>recX</i> _RT_FW        | CCGCTATCTCGAAAGCTTCA                 |                  |                                     |
| <i>recX</i> _RT_RV        | CGCACTCCAGTCGACCTC                   |                  |                                     |
| <i>lexA</i> _RT_FW        | GGCATGAGCATGAAGGACAT                 |                  |                                     |
| <i>lexA</i> _RT_RV        | GAGCGAACTCAGGGTTTTCC                 |                  |                                     |
| <i>imuB</i> _RT_FW        | GCCATGCTCTTCGAACTGAC                 |                  |                                     |
| <i>imuB</i> _RT_RV        | TGTTCCCAGCCGAGATACTG                 |                  |                                     |
| <i>dinB</i> _RT_FW        | GACTGTTTCTATGCCGCCCT                 |                  |                                     |
| <i>dinB</i> _RT_RV        | CAGATCGGGACACAGCTTGA                 |                  |                                     |
| <i>polA</i> _RT_FW        | TCGATTTCTCGCCCTGATG                  |                  |                                     |
| <i>polA</i> _RT_RV        | TCGCGATTTTCTCGAGCTT                  |                  |                                     |
| <i>polB</i> _RT_FW        | CTCGACTTCCTCCTCGAACG                 |                  |                                     |
| <i>polB</i> _RT_RV        | CTTGTAGTCGAGCACCAGCA                 |                  |                                     |
| <i>polC</i> _RT_FW        | GGTTATCGCAACCTCACCGA                 |                  |                                     |
| <i>polC</i> _RT_RV        | GGAACACCTCCATCCACTCG                 |                  |                                     |
| <i>rpoD</i> _RT_FW        | GGGCGAAGAAGGAAATGGTC                 |                  |                                     |
| <i>rpoD</i> _RT_RV        | CAGGTGGCGTAGGTGGAGAA                 |                  |                                     |
| M13FW                     | GTTTTCCCAGTCACGAC                    |                  | Sequencing of                       |
| M13RV                     | CAGGAAACAGCTATGAC                    |                  | pBS constructs                      |

<sup>a</sup> The restriction site used for cloning is underlined in the primer sequence.

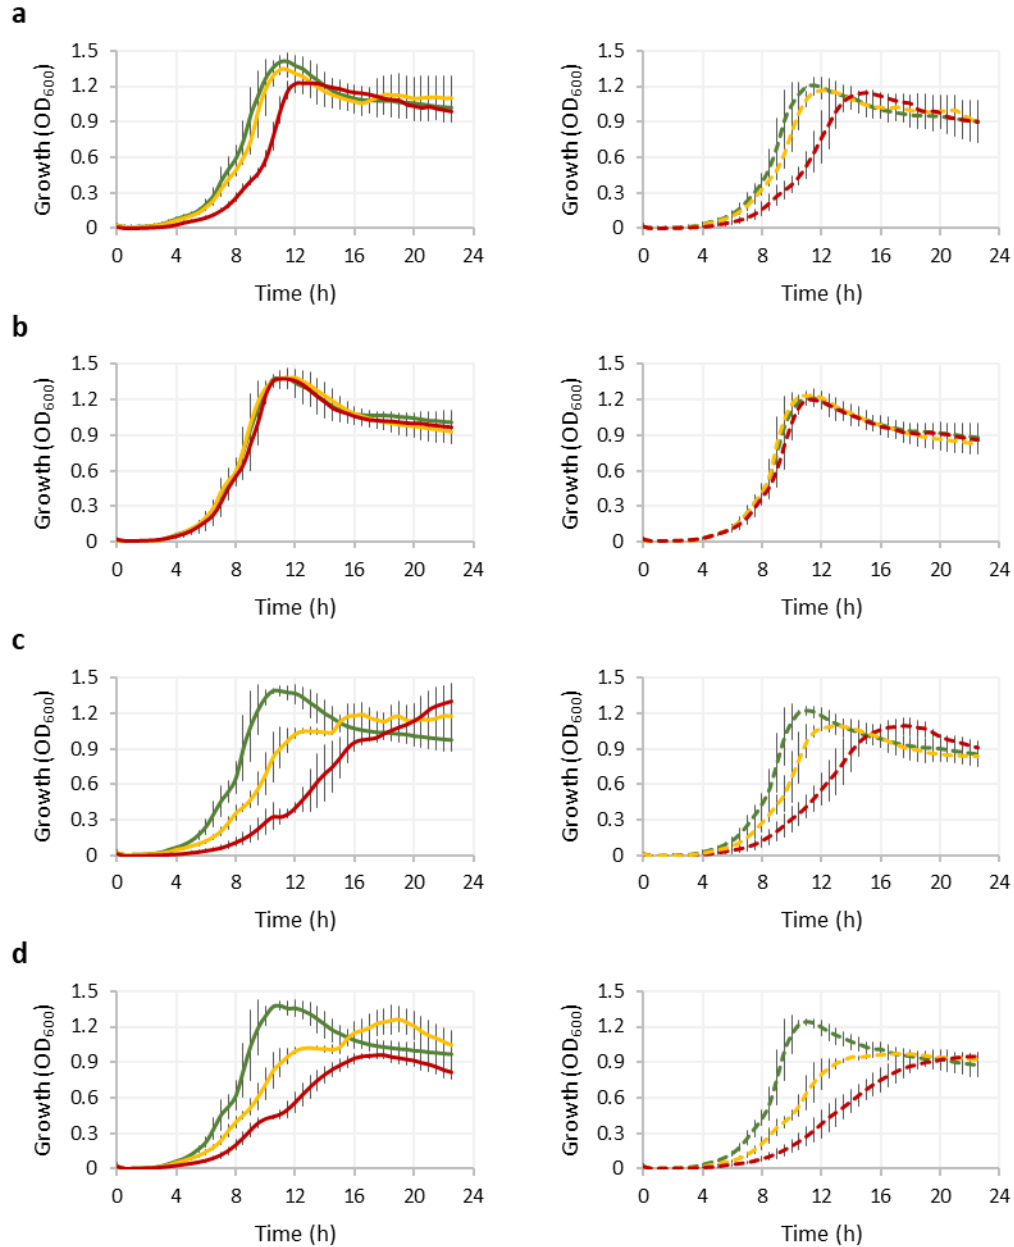

**Figure S1.** Growth curves of *P. aeruginosa* PAO1 (left panels, solid lines) and the  $\Delta recA$  mutant (right panels, dotted lines) cultured in MH at 37°C in microtiter plates in the absence (green lines) or in the presence of (a) gentamicin, (b) colistin, (c) ofloxacin or (d) ciprofloxacin at 0.125×MIC (orange lines) or 0.25×MIC (red lines). Values are the mean ( $\pm$  SD) of three independent experiments.
